# Supplementary material
Source: HighWire-hosted journal article supplement (https://jnm.snmjournals.org/highwire/filestream/102438/field_highwire_adjunct_files/0/253419_Supplemental_Data.pdf)
Supplement: 253419_Supplemental_Data.pdf [file 253419_Supplemental_Data.pdf]

**Supplemental Table 1**

Comparisons of clinical characteristics and hemodynamic data between the patients with CI and the controls

| Characteristic                       | CI                    | Controls             | p value |
|--------------------------------------|-----------------------|----------------------|---------|
| Number                               | 13                    | 6                    |         |
| Male/female                          | 7/6                   | 5/1                  | 0.22    |
| Age (years)                          | 70.4 ± 8.9            | 55.5 ± 14.8          | 0.06    |
| Height (cm)                          | 160.3 ± 7.1           | 164.6 ± 10.0         | 0.30    |
| Weight (kg)                          | 58.5 ± 7.0            | 65.5 ± 11.7          | 0.12    |
| Body mass index (kg/m <sup>2</sup> ) | 22.8 ± 2.9            | 24.1 ± 2.9           | 0.40    |
| Hypertension (%)                     | 7 (53.8)              | 2 (33.3)             | 0.41    |
| Diabetes (%)                         | 2 (15.4)              | 2 (33.3)             | 0.37    |
| Echocardiographic parameters         |                       |                      |         |
| LVEF (%)                             | 67.8 ± 10.8           | 68.4 ± 7.6           | 0.90    |
| LVEDVI (ml/m <sup>2</sup> )          | 66.4 ± 11.7           | 65.5 ± 9.4           | 0.86    |
| LVESVI (ml/m <sup>2</sup> )          | 21.0 ± 5.4            | 20.6 ± 4.7           | 0.88    |
| LAD (mm)                             | 36.3 ± 5.4            | 33.7 ± 3.7           | 0.29    |
| E (cm/sec)                           | 59.1 ± 17.6           | 60.7 ± 8.3           | 0.84    |
| e' mean (cm/sec)                     | 8.0 ± 1.8             | 8.9 ± 1.5            | 0.30    |
| E/e' mean                            | 7.6 ± 2.4             | 7.0 ± 1.6            | 0.60    |
| Laboratory data                      |                       |                      |         |
| BNP (pg/mL)                          | 26.6 [IQR, 10.1–96.4] | 12.0 [IQR, 7.9–19.4] | 0.11    |
| Serum creatinine (mg/dL)             | 0.69 ± 0.17           | 0.70 ± 0.19          | 0.88    |

|                                    |               |               |      |
|------------------------------------|---------------|---------------|------|
| eGFR (mL/min/1.73 m <sup>2</sup> ) | 75.3 ± 13.1   | 87.0 ± 21.1   | 0.15 |
| Norepinephrine (pg/mL)             | 596.9 ± 175.9 | 444.3 ± 148.4 | 0.08 |
| Medication                         |               |               |      |
| Loop diuretics (%)                 | 1 (7.7)       | 1 (16.7)      | 0.55 |
| ACEIs (%)                          | 2 (15.4)      | 0 (0)         | 0.31 |
| ARBs (%)                           | 2 (15.4)      | 0 (0)         | 0.31 |
| CCBs (%)                           | 5 (38.5)      | 2 (33.3)      | 0.83 |
| Statins (%)                        | 1 (7.7)       | 0 (0)         | 0.49 |
| β-blockers (%)                     | 0             | 0             | N/A  |

---

Data are expressed as mean ± standard deviation or number or frequency (%).

B-type natriuretic peptide (BNP) is represented by the median and interquartile range (IQR).

CI, chronotropic incompetence; LVEF, left ventricular ejection fraction; LVEDVI, left ventricular end-diastolic volume index; LVESVI, left ventricular end-systolic volume index; LAD, left atrium diameter; E, Early diastolic transmitral flow velocity; e', mitral annular velocity during early diastole; eGFR, estimated glomerular filtration rate; ACEI, angiotensin-converting enzyme inhibitor; ARB, angiotensin receptor blocker; CCB, calcium channel blocker.

**Supplemental Table 2.** The results of CPX

| Rest                                       | CI           | Controls     | P value |
|--------------------------------------------|--------------|--------------|---------|
| Heart rate (beats/min)                     | 66.7 ± 13.8  | 67.8 ± 12.2  | 0.86    |
| Systolic BP (mm Hg)                        | 128.2 ± 13.8 | 129.8 ± 15.0 | 0.81    |
| Diastolic BP (mm Hg)                       | 68.7 ± 11.5  | 73.3 ± 8.7   | 0.40    |
| <b>Peak exercise</b>                       |              |              |         |
| Heart rate (beats/min)                     | 116.9 ± 11.0 | 154.8 ± 14.4 | <0.001  |
| Systolic BP (mm Hg)                        | 183.5 ± 23.3 | 203.2 ± 17.6 | 0.09    |
| Diastolic BP (mm Hg)                       | 86.5 ± 16.8  | 94.2 ± 19.7  | 0.39    |
| Double product (beats/min*mm Hg)           | 21800 ± 4200 | 31400 ± 4600 | <0.001  |
| Percent predicted heart rate (%)           | 80.7 ± 8.2   | 93.7 ± 5.1   | 0.003   |
| Anaerobic threshold (mL/kg/min)            | 11.9 ± 2.9   | 14.9 ± 2.2   | 0.04    |
| Peak VO <sub>2</sub> (mL/kg/min)           | 15.9 ± 3.7   | 23.5 ± 5.5   | 0.003   |
| Percent predicted peak VO <sub>2</sub> (%) | 74.5 ± 19.1  | 80.5 ± 18.0  | 0.52    |
| VE/VCO <sub>2</sub> slope                  | 34.6 ± 5.9   | 33.8 ± 5.4   | 0.79    |
| Peak RER                                   | 1.23 ± 0.06  | 1.27 ± 0.07  | 0.21    |
| Peak O <sub>2</sub> pulse (mL/beats)       | 7.8 ± 2.4    | 10.0 ± 2.5   | 0.08    |
| Exercise time (min)                        | 5.4 ± 2.3    | 8.1 ± 1.2    | 0.02    |
| Peak work (watt)                           | 85.4 ± 30.1  | 131.8 ± 37.2 | 0.01    |
| Heart rate recovery (beats/min)            | 19.9 ± 14.6  | 18.3 ± 7.6   | 0.81    |

Data represent mean ± standard deviation.

CI, chronotropic incompetence; BP, blood pressure; VO<sub>2</sub>, oxygen consumption, VE/VCO<sub>2</sub>, minute ventilation/carbon dioxide production; RER, respiratory exchange rate.

**Supplemental Table 3.** Results of univariate regression analysis for the  $\beta$ -AR density.

| Variable                             | r     | P    |
|--------------------------------------|-------|------|
| Age (years)                          | -0.42 | 0.08 |
| Height (cm)                          | 0.21  | 0.39 |
| Weight (kg)                          | 0.09  | 0.73 |
| Body mass index (kg/m <sup>2</sup> ) | -0.07 | 0.78 |
| LVEF (%)                             | -0.29 | 0.23 |
| e' mean (cm/sec)                     | 0.37  | 0.12 |
| E/e' mean                            | -0.14 | 0.56 |
| Rest heart rate (beats/min)          | -0.01 | 0.98 |
| Rest systolic BP (mm Hg)             | 0.08  | 0.74 |
| Rest diastolic BP (mm Hg)            | 0.001 | 0.99 |
| Peak heart rate (beats/min)          | 0.54  | 0.02 |
| Peak systolic BP (mm Hg)             | 0.47  | 0.05 |
| Peak diastolic BP (mm Hg)            | 0.12  | 0.64 |
| Log BNP (pg/mL)                      | -0.39 | 0.10 |
| Norepinephrine (pg/mL)               | -0.29 | 0.22 |
| eGFR (mL/min/1.73m <sup>2</sup> )    | 0.41  | 0.08 |

Abbreviations as in Supplement 1 and 2.
